# Supplementary material for: Purification of aqueous orange II solution through adsorption and visible-light-induced photodegradation using ZnO-modified g-C3N4 composites
Source: Royal Society of Chemistry journal article supplement (doi:10.1039/d4ra01481b), 2024-01-01
Supplement: d4ra01481b1.pdf [file d4ra01481b1.pdf]

## Electronic Supplementary Information

### **Purification of aqueous orange II solution through adsorption and visible-light-induced photodegradation using ZnO-modified g-C<sub>3</sub>N<sub>4</sub> composites**

Mahmudul Hassan Suhag,<sup>\*a,b</sup> Aklima Khatun,<sup>a</sup> Ikki Tateishi,<sup>c</sup> Mai Furukawa,<sup>a</sup> Hideyuki Katsumata,<sup>a</sup> and Satoshi Kaneco<sup>\*a</sup>

<sup>a</sup> Department of Applied Chemistry, Graduate School of Engineering, Mie University, Tsu, Mie 514-8507, Japan

<sup>b</sup> Department of Chemistry, University of Barishal, Barishal 8254, Bangladesh

<sup>c</sup> Mie Global Environment Center for Education & Research, Mie University, Tsu, Mie 514-8507, Japan

\* Correspondence: [suhag.che057@gmail.com](mailto:suhag.che057@gmail.com), [kaneco@chem.mie-u.ac.jp](mailto:kaneco@chem.mie-u.ac.jp)

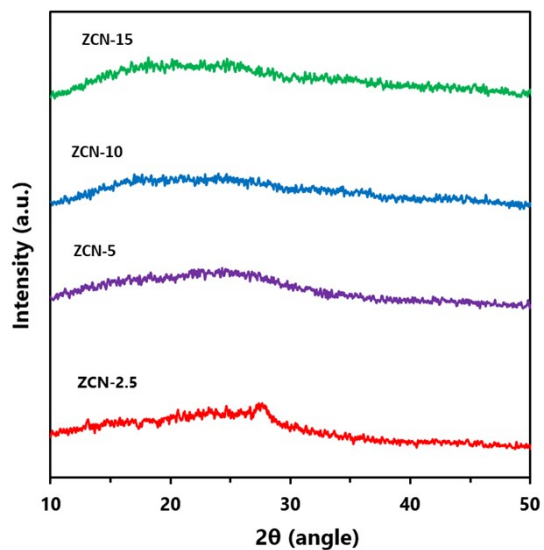

Fig. S1 Enlarged ( $2\theta$  range  $10-50^\circ$ ) XRD patterns of ZCN-2.5, 5, 10 and 15 composites.

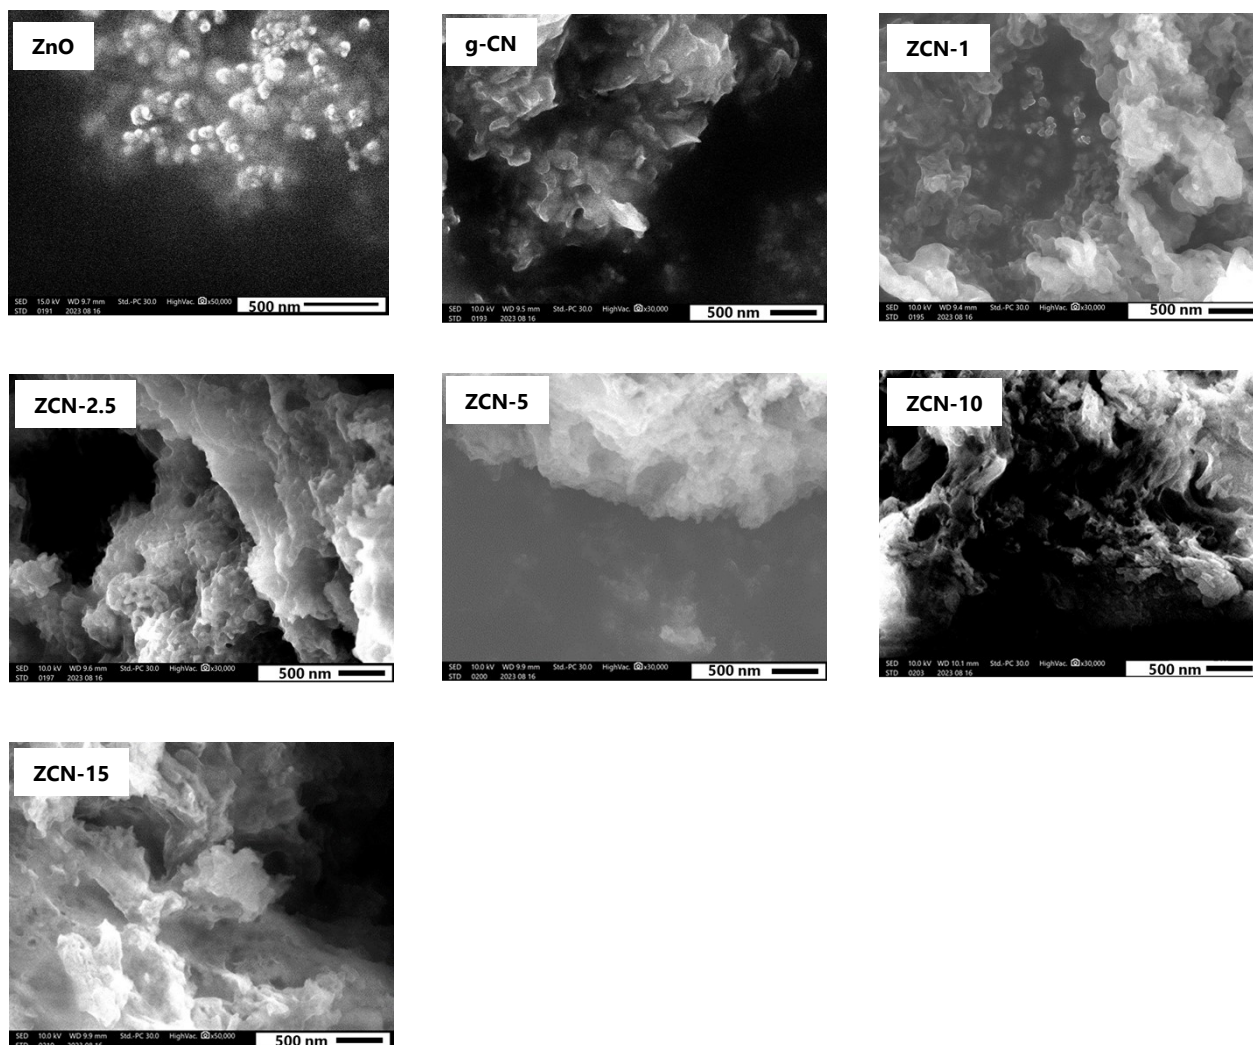

Fig. S2 SEM images of ZCN composites, ZnO, and g-CN.

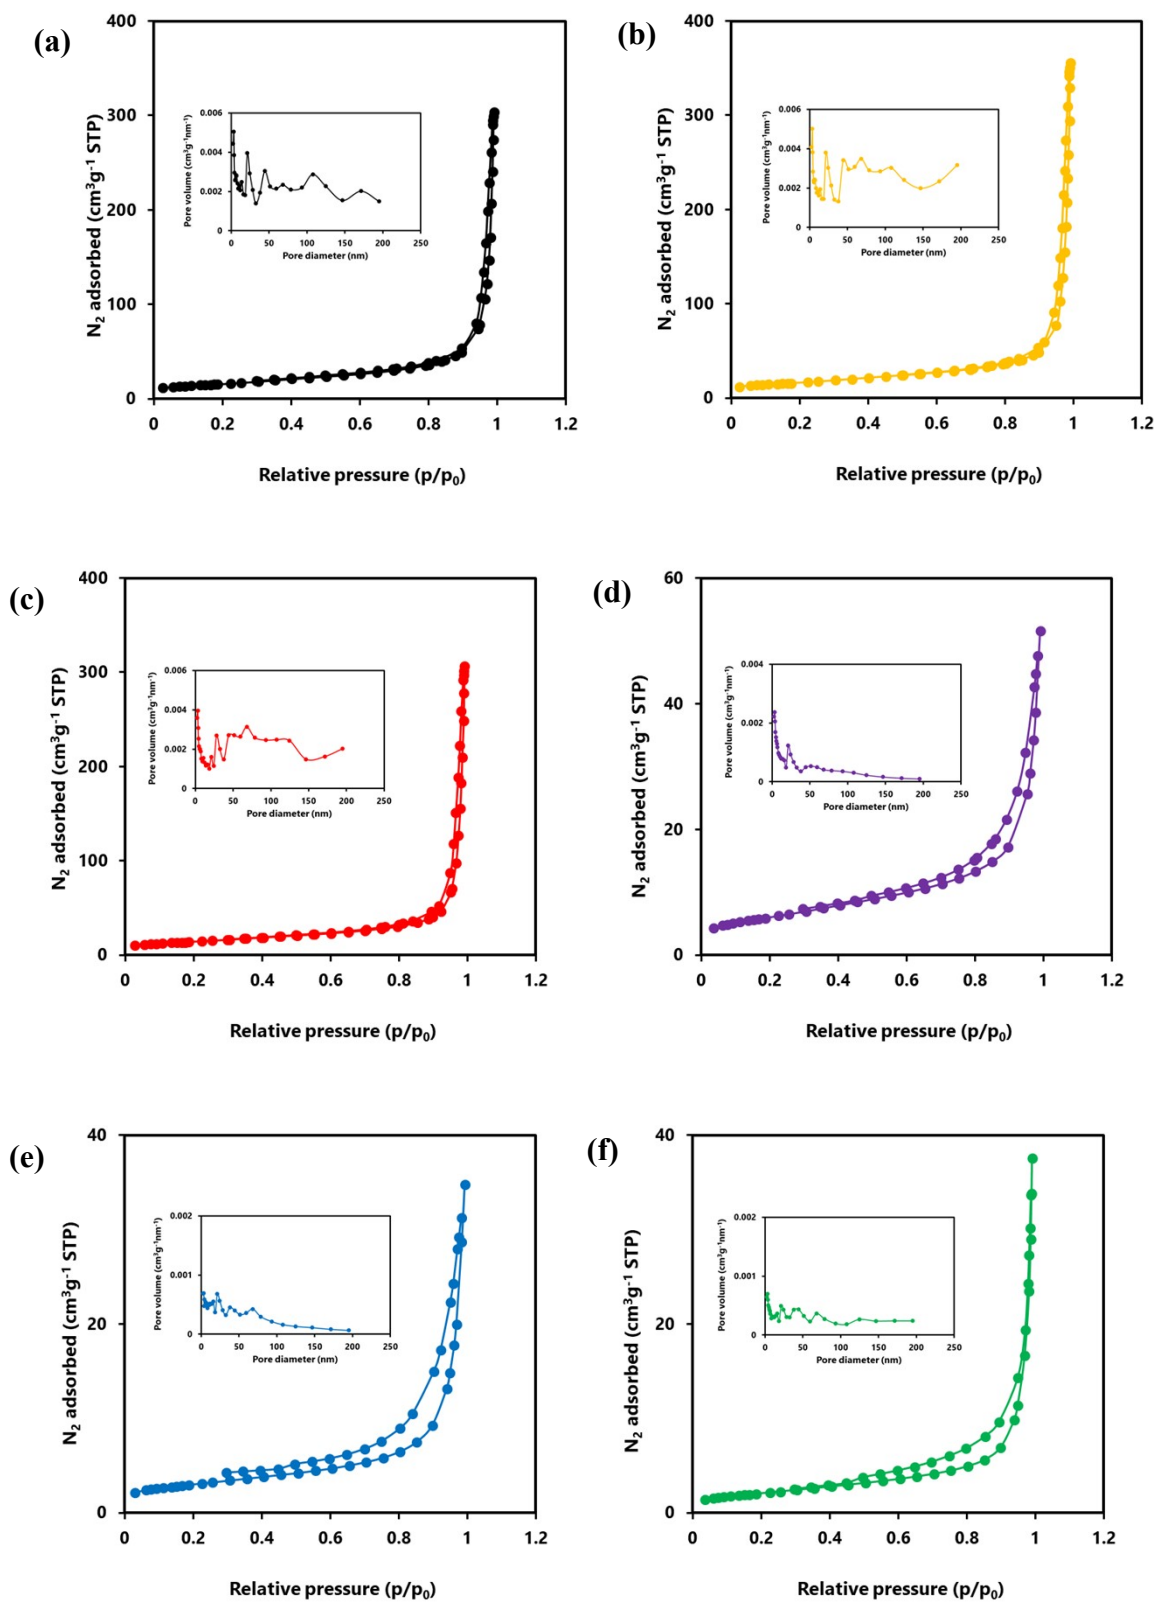

**Fig. S3**  $N_2$  adsorption-desorption isotherms (inset: pore size distribution curves) of (a) g-CN, (b) ZCN-1, (c) ZCN-2.5, (d) ZCN-5, (e) ZCN-10, and (f) ZCN-15.

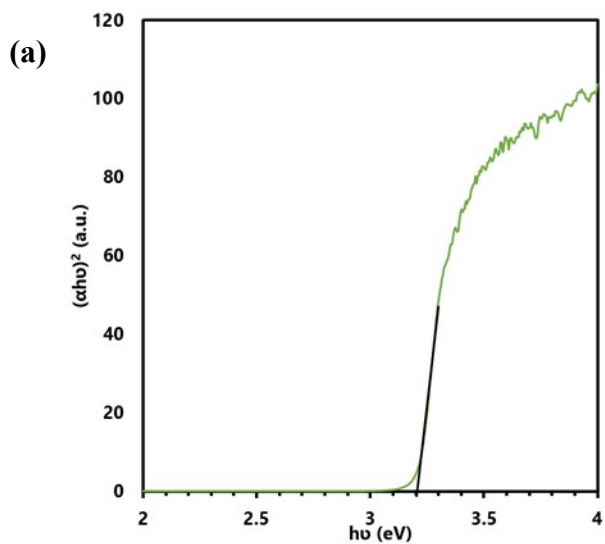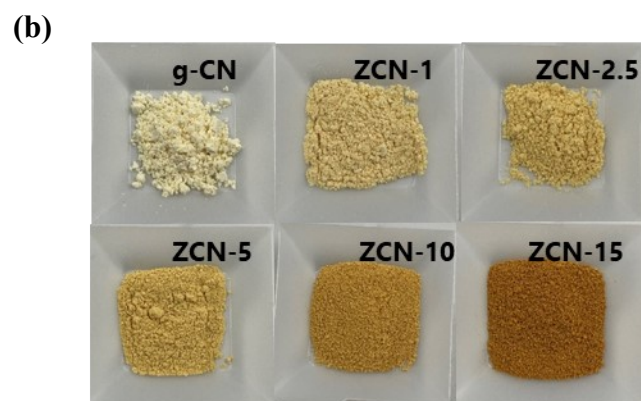

**Fig. S4** (a) Tauc plot of ZnO and (b) Photographs for appearance of all ZCN composites and bare g-CN.

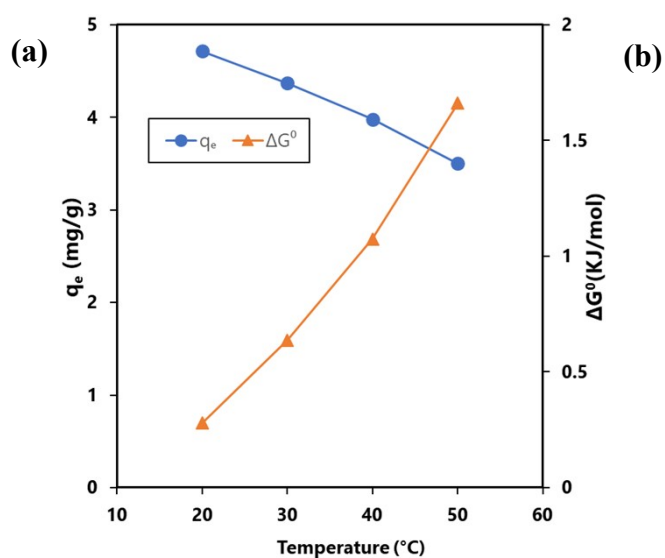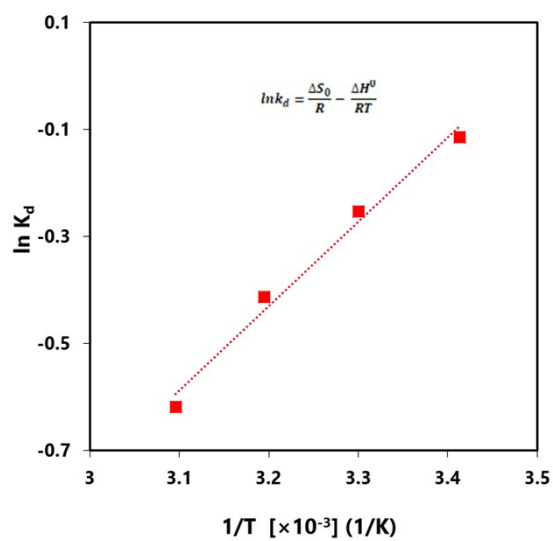

**Fig. S5** (a) The relationship between temperature and amount of orange II dye (10 ppm) adsorbed  $q_e$  on ZCN-2.5 composite as well as corresponding Gibbs free energy change ( $\Delta G^0$ ); (b) the plot of  $\ln K_d$  versus  $1/T$ .

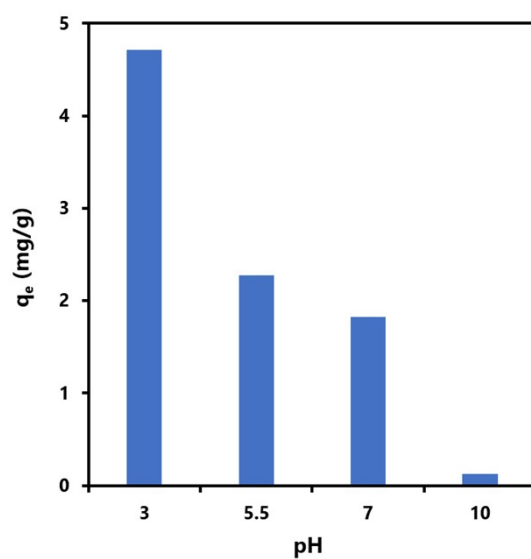

**Fig. S6** The effect of pH for adsorption of orange II dye (10 ppm) on ZCN-2.5 composite.

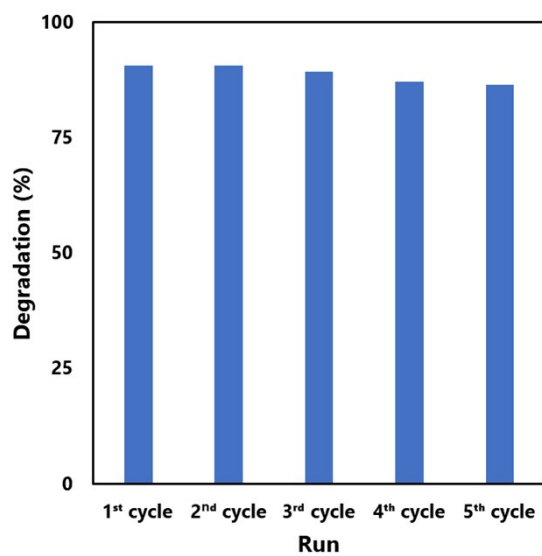

**Fig. S7** Photocatalytic reusability of ZCN-2.5 composite on photocatalytic degradation of orange II solution.

**Table S1** Surface atomic ratios of g-CN and ZCN-2.5 composite

| Samples | C (%) | N (%) | O (%) | Zn (%) | C/N molar ratio | C/O molar ratio |
|---------|-------|-------|-------|--------|-----------------|-----------------|
| g-CN    | 43.8  | 56.0  | 0.1   | -      | 0.78            | 438             |
| ZCN-2.5 | 43.2  | 51.0  | 3.5   | 2.2    | 0.85            | 12.34           |

**Table S2** Comparison of the maximum monolayer adsorption capacities of Orange II onto synthesized ZCN-2.5 and various reported adsorbents

| Adsorbents                                           | Maximum monolayer adsorption capacity, $q_{\max}$ (mg g <sup>-1</sup> ) | References    |
|------------------------------------------------------|-------------------------------------------------------------------------|---------------|
| Biosolid adsorbent                                   | 0.60                                                                    | 27            |
| Spent brewery grains                                 | 30.47                                                                   | 28            |
| Activated carbon cloths                              | 90.00                                                                   | 29            |
| Rice husk ash                                        | 59.10                                                                   | 30            |
| Rice husk/CoFe <sub>2</sub> O <sub>4</sub> composite | 65.00                                                                   | 30            |
| Rice husk/MnFe <sub>2</sub> O <sub>4</sub> composite | 69.40                                                                   | 30            |
| Bottom ash                                           | 12.51                                                                   | 31            |
| De-oiled soya                                        | 8.88                                                                    | 31            |
| Chitosan                                             | 116.00                                                                  | 32            |
| Unmodified zeolite                                   | 0.63                                                                    | 33            |
| Surfactant-modified zeolite                          | 3.62                                                                    | 33            |
| ZCN-2.5                                              | 15.53                                                                   | Present study |
